# Supplementary material
Source: ML conference proceedings conference paper supplement (https://proceedings.mlr.press/v80/rosenfeld18a.html)
Supplement: Supplementary file 1 [file rosenfeld18a-supp.pdf]

---

# Learning to Optimize Combinatorial Functions: Supplementary Material

---

Nir Rosenfeld<sup>1</sup> Eric Balkanski<sup>1</sup> Amir Globerson<sup>2</sup> Yaron Singer<sup>1</sup>

**Theorem 1.** For all  $\alpha > 1$  and  $\epsilon, \delta > 0$ , for  $m$  sufficiently large, there exists a family of functions  $\mathcal{F}$  and a function  $M_{\text{PMAC}}(\cdot)$  such that

- for all  $\epsilon', \delta' > 0$ :  $\mathcal{F}$  is  $\alpha$ -PMAC-learnable with sample complexity  $M_{\text{PMAC}}(n, \delta', \epsilon', \alpha)$ , and
- given strictly less than  $M_{\text{PMAC}}(n, \delta, 1 - (1 - \epsilon)^{1/m}, \alpha)$  samples,  $\mathcal{F}$  is not  $\alpha$ -DOPS, i.e.,

$$M_{\text{DOPS}}(n, m, \delta, \epsilon, \alpha) \geq M_{\text{PMAC}}(n, \delta, 1 - (1 - \epsilon)^{1/m}, \alpha).$$

*Proof.* Fix  $\alpha > 1$  and  $\epsilon > 0$ . Define  $p := 1 - (1 - \epsilon)^{1/m} + \epsilon_s$ , for some small constant  $\epsilon_s > 0$ , and let  $S_1, \dots, S_{1/p}$  be  $1/p$  arbitrary distinct sets. The hard class of functions is  $\mathcal{F} = \{f_i\}_{i \in [1/p]}$  where

$$f_i(S) = \begin{cases} \alpha & \text{if } S = S_i \\ \frac{1}{2} & \text{otherwise} \end{cases}$$

Consider the distribution  $\mathcal{D}$  which is the uniform distribution over sets  $S_1, \dots, S_{1/p}$ , so  $S_j$  is drawn with probability  $p$  for all  $j \in [1/p]$ . We first argue that the sample complexity for PMAC-learning  $f$  over  $\mathcal{D}$  is at most

$$M_{\text{PMAC}}(n, \delta', \epsilon', \alpha) = \begin{cases} 0 & \text{if } \epsilon' \geq p \\ \frac{\log(1/\delta')}{\log(1/(1-p))} & \text{if } \epsilon' < p \end{cases}$$

Note that if  $\epsilon' \geq p$ ,  $\tilde{f}(S) = 1/2$  for all  $S$  is correct with probability  $1 - p \geq 1 - \epsilon'$  over  $S \sim \mathcal{D}$  and with probability 1 over the samples. If  $\epsilon' < p$ , if there exists sample  $S_i$  such that  $f(S_i) = \alpha$ , then  $\tilde{f}(S_i) = \alpha$ , and  $\tilde{f}(S) = 1/2$  for all other  $S$ . Note that that this is correct with probability 1 over  $S \sim \mathcal{D}$  if  $S_i$  is in the samples. The probability that  $S_i$  is in

---

<sup>1</sup>Harvard University <sup>2</sup>Tel Aviv University. Correspondence to: Nir Rosenfeld <nir.rosenfeld@g.harvard.edu>.

the samples

$$\begin{aligned} 1 - (1 - p)^m &= 1 - (1 - p)^{\frac{\log(1/\delta')}{\log(1/(1-p))}} \\ &= 1 - e^{\frac{\log(\delta')}{\log(1-p)} \log(1-p)} \\ &= 1 - \delta'. \end{aligned}$$

Thus,  $\tilde{f}$  is correct with probability  $1 - \delta'$  over the samples. Next, we argue that for all  $\delta > 0$  and  $m$  sufficiently large, the sample complexity for DOPS is at least

$$\begin{aligned} M_{\text{PMAC}}(n, \delta, 1 - (1 - \epsilon)^{1/m}, \alpha) &= \\ M_{\text{PMAC}}(n, \delta, p - \epsilon_s, \alpha) &= \frac{\log(1/\delta)}{\log(1/(1-p))}. \end{aligned}$$

Consider the random function  $f_i$  where  $i \in [1/p]$  is uniformly random. Let  $\mathcal{F}'$  be the randomized collection of functions  $f_i$  such that  $S_i$  is in the testing set but not in the training set. Since  $S_i$  is not in the testing set, we have that for all  $f_i \in \mathcal{F}'$  and for all sets  $S$  in the testing set,

$$f_i(S) = 1.$$

Thus, the functions in  $\mathcal{F}'$  are *indistinguishable* from the samples in the training set. This implies that the decisions of the algorithm are *independent* of the random variable  $i$ , *conditioned* on  $f_i \in \mathcal{F}'$ . Let  $S$  be the set in the testing set that is returned by the algorithm, we obtain that

$$\begin{aligned} \mathbb{E}_{i: f_i \in \mathcal{F}'} [f_i(S)] &= \Pr_{i: f_i \in \mathcal{F}'} [S = S_i] \cdot \alpha + \Pr_{i: f_i \in \mathcal{F}'} [S \neq S_i] \cdot \frac{1}{2} \\ &\leq \frac{\alpha}{|\mathcal{F}'|} + \frac{1}{2} \end{aligned}$$

since  $S$  is independent of  $i$  conditioned on  $f_i \in \mathcal{F}'$ . Consider the case where  $S_i$  is not in the training set with probability strictly greater than  $\delta$ . The probability that  $S_i$  is in the testing set is  $1 - (1 - p)^m = \epsilon + \epsilon_s$ . Thus a function is in  $\mathcal{F}'$  with probability at least  $\delta(\epsilon + \epsilon_s)$ . Note that  $1/p$  is arbitrarily large if  $m$  is arbitrarily large. Thus,  $|\mathcal{F}'| > 2\alpha$  with arbitrarily large probability if  $m$  is arbitrarily large for fixed  $\epsilon, \delta$ , and  $\alpha$ . Combining with the previous inequality,

this implies that

$$\begin{aligned} \mathbb{E}_{i: f_i \in \mathcal{F}'} [f_i(S)] < 1 &= \frac{1}{\alpha} \cdot f_i(S_i) \\ &= \frac{1}{\alpha} \cdot \mathbb{E}_{i: f_i \in \mathcal{F}'} [\max_{S \in \mathcal{S}_{te}} f_i(S)] \end{aligned}$$

where the last equality is since  $S_i \in \mathcal{S}_{te}$  for all  $i \in \mathcal{F}'$ . Thus, there exists at least one function  $f_i \in \mathcal{F}$  such that the algorithm does not obtain an  $\alpha$ -approximation when  $S_i$  is in the testing set and not in the training set.

The probability that  $S_i$  is in the testing set is  $1 - (1 - p)^m = \epsilon + \epsilon_s$ . Thus,  $S_i$  needs to be in the training set with probability at least  $1 - \delta$ , otherwise we don't get an  $\alpha$ -apx with probability  $1 - \epsilon$ . The probability that  $S_i$  is not in the training set is  $(1 - p)^m$ . Thus, we need  $\delta > (1 - p)^m$ , or

$$\begin{aligned} m &> \frac{\log(1/\delta)}{\log(1/(1 - p))} \\ &= m_{\text{PMAC}}(n, \delta, p - \epsilon_s, \alpha) \\ &= m_{\text{PMAC}}(n, \delta, 1 - (1 - \epsilon)^{1/m}, \alpha). \end{aligned}$$

□
